# Supplementary material for: In silico and in vitro models reveal the molecular mechanisms of hypocontractility caused by TPM1 M8R
Source: Frontiers journal article supplement (doi:10.3389/fphys.2024.1452509), 2024-08-30
Supplement: Data_Sheet_1.PDF [file Data_Sheet_1.PDF]

*Supplemental Material*

In Silico and In Vitro Models Reveal the Molecular Mechanisms of  
Hypocontractility Caused by *TPM1* M8R

A.

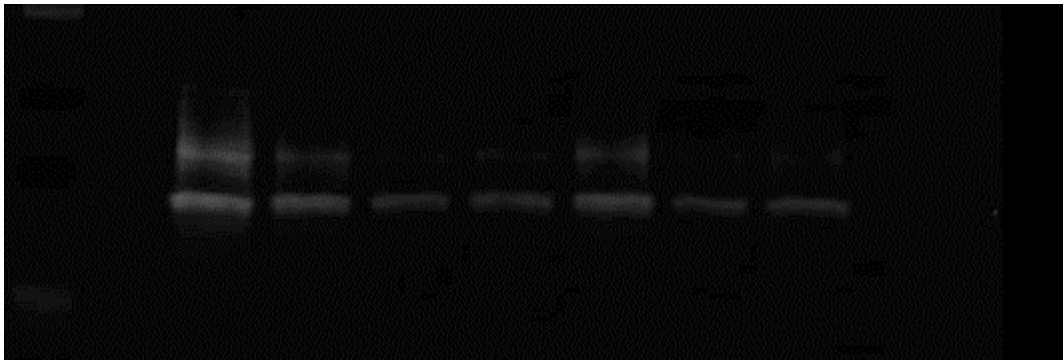

B.

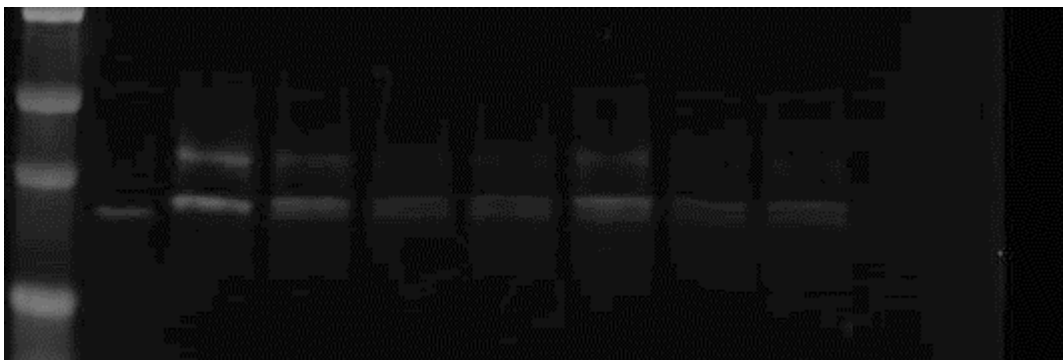

**Supplemental Figure 1:** Western blot scanned .tiff files used in Figure 3. A) Anti-FLAG imaged in 800 channel; B) Anti-TPM1 imaged in 700 channel.

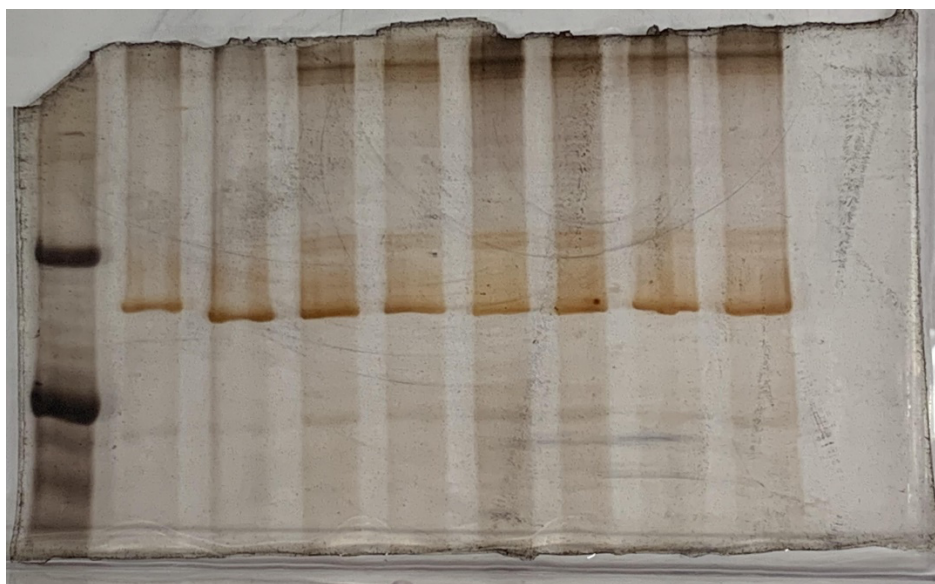

**Supplemental Figure 2:** Full silver stain used in Figure 3.

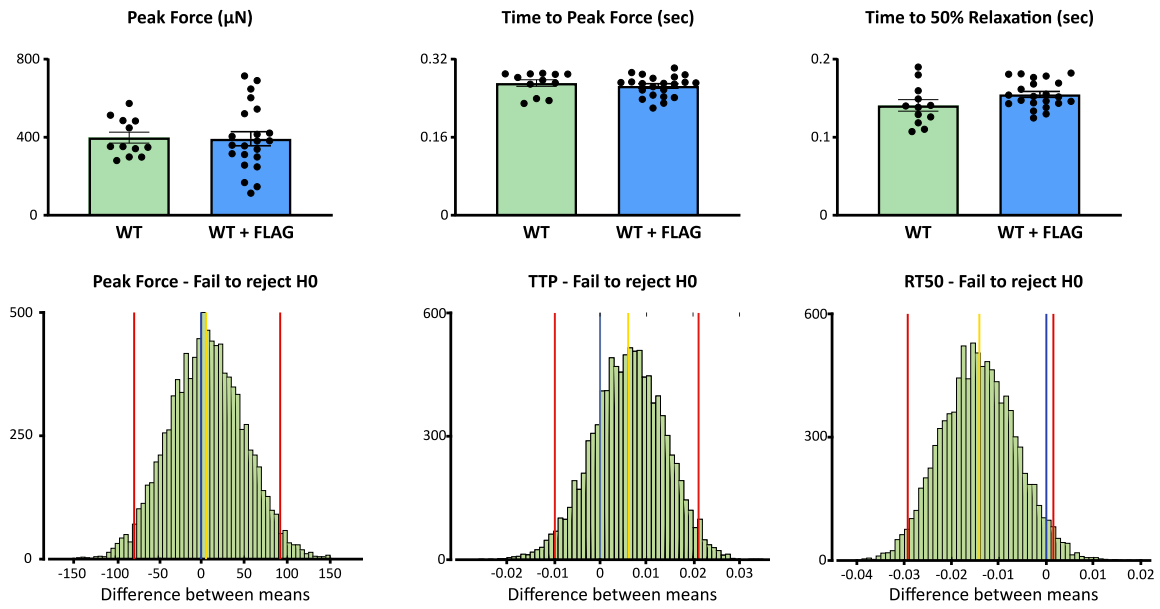

**Supplemental Figure 3.** Bootstrap analysis of tissues transduced with WT TPM1 vs WT TPM1 + FLAG.
